# Supplementary material for: Mutations in AraR leading to constitutive of arabinolytic genes in Aspergillus niger under derepressing conditions
Source: PubMed Central journal article supplement (PMC6486530; doi:10.1007/s00253-019-09777-0), 2019-04-08
Supplement: 253_2019_9777_MOESM1_ESM.pdf [file 253_2019_9777_MOESM1_ESM.pdf]

Supplemental figures/tables file

Applied Microbiology and Biotechnology

Mutations in AraR leading to constitutive expression of arabinolytic genes in *Aspergillus niger* under derepressing conditions

Jos Reijngoud<sup>1</sup>, Malte Deseke<sup>1</sup>, Elmar T.M. Halbesma<sup>1</sup>, Ebru Alazi<sup>1\*</sup>, Mark Arentshorst<sup>1</sup>, Peter J. Punt<sup>1,2</sup>, Arthur F.J. Ram<sup>1\*\*</sup>

<sup>1</sup>Molecular Microbiology and Biotechnology, Institute of Biology Leiden, Leiden University, The Netherlands

<sup>2</sup>Dutch DNA Biotech, Hugo R Kruytgebouw 4-Noord, Padualaan 8, 3584 CH Utrecht, The Netherlands.

\* current address: Dutch DNA Biotech, Hugo R Kruytgebouw 4-Noord, Padualaan 8, 3584 CH Utrecht, The Netherlands

\*\*corresponding author

Corresponding Author: E-mail: a.f.j.ram@biology.leidenuniv.nl, Tel: +31 71 527 4914; Fax: +31 71 527 4900

### **Supplemental files**

Supplemental Table 1. Overview of the used primers

Supplemental Fig. 1. Southern blots analysis of *A. niger* strains EH1.2

Supplemental Fig. 2. Southern blots analysis of *A. niger* strains EH2.1 and EH3.1

Supplemental Fig. 3. Diagnostic PCR analysis of *A. niger creA* deletion strains JR16.2 and JR17.2

Supplemental Fig. 4. Southern blots analysis of *A. niger* strains JR12.3, 13.2 and 13.9

Supplemental Fig. 5. Alignments AraR and XlnR in four *Aspergillus* species and XlnR of *Trichoderma reesei*

Supplemental Table 1. Overview of the primers used in this study

| Primer name | Sequence (5'-3')                                  | Remark          | Used for                                                                        |
|-------------|---------------------------------------------------|-----------------|---------------------------------------------------------------------------------|
| araRP1f     | ACCGTTTGGAAAGTAGTGG                               |                 | Amplification and sequencing <i>araR</i>                                        |
| araRP2r     | AAGCGGGGAGAAAGAGACCG                              |                 | Sequencing <i>araR</i>                                                          |
| araRP3f     | TGGATCGCTTCTGCTCTGCC                              |                 | Sequencing <i>araR</i>                                                          |
| araRP4r     | TGTCGCATTAACAGTGTGCC                              |                 | Sequencing <i>araR</i>                                                          |
| araRP5f     | AGGACGCATTGCGCGATCCC                              |                 | Sequencing <i>araR</i>                                                          |
| araRP6r     | CGACCGCAGCATGAAGTGGG                              |                 | Sequencing <i>araR</i>                                                          |
| araRP7f     | CTCCTCGACCTAGCAGCC                                |                 | Sequencing <i>araR</i>                                                          |
| araRP8r     | TTCTCGCCTGACAGTGGG                                |                 | Sequencing <i>araR</i>                                                          |
| araRP9f     | TTGCGTATGCGACCGTGGCC                              |                 | Sequencing <i>araR</i>                                                          |
| araRP10r    | CCCGCTTCTTTCTGCAGCCG                              |                 | Sequencing <i>araR</i>                                                          |
| araRP11f    | TCGAGGATAAGGACTTCTGG                              |                 | Sequencing <i>araR</i>                                                          |
| araRP12r    | CGATCCAAAACAACAAGCC                               |                 | Sequencing <i>araR</i>                                                          |
| araRP13f    | CTCGGTTGATTATTTGCC                                |                 | Sequencing <i>araR</i>                                                          |
| araRP14r    | TGTCGCTGTAGCTGGAGG                                |                 | Amplification and sequencing <i>araR</i>                                        |
|             |                                                   |                 |                                                                                 |
| araRP1f     | ACCGTTTGGAAAGTAGTGG                               |                 | $\Delta$ <i>araR</i> Bipartite fragment - 5' <i>araR</i> flank::5' <i>nicB</i>  |
| araRP18r    | <b>CAATTCCAGCAGCGGCTT</b> GCCGACATTGGCGATTC       | Overlap in bold | $\Delta$ <i>araR</i> Bipartite fragment - 5' <i>araR</i> flank::5' <i>nicB</i>  |
| nicBnidP5f  | <b>AAGCCGCTGCTGGAATTG</b> CGTTATGCACAGCTCCGTCTT   | Overlap in bold | $\Delta$ <i>araR</i> Bipartite fragment - 5' <i>araR</i> flank::5' <i>nicB</i>  |
| nicBnidP8r  | GAACAGCCTTCGGGATTGC                               |                 | $\Delta$ <i>araR</i> Bipartite fragment - 5' <i>araR</i> flank::5' <i>nicB</i>  |
| nicBnidP7f  | CGCCTTATATCCGATTGGCTT                             |                 | $\Delta$ <i>araR</i> Bipartite fragment - 3' <i>nicB</i> ::3' <i>araR</i> flank |
| nicBnidP6r  | <b>CGATGGATAATTGTGCCGTGT</b> GCGCATAACAGAAGCATTGA | Overlap in bold | $\Delta$ <i>araR</i> Bipartite fragment - 3' <i>nicB</i> ::3' <i>araR</i> flank |
| araRP17f    | <b>ACACGGCACAATTATCCATCG</b> AGGCCATCGGTTGGAGAGA  | Overlap in bold | $\Delta$ <i>araR</i> Bipartite fragment - 3' <i>nicB</i> ::3' <i>araR</i> flank |
| araRP14r    | TGTCGCTGTAGCTGGAGG                                |                 | $\Delta$ <i>araR</i> Bipartite fragment - 3' <i>nicB</i> ::3' <i>araR</i> flank |
|             |                                                   |                 |                                                                                 |
| araRP1f     | ACCGTTTGGAAAGTAGTGG                               |                 | Southern blot probe - verification <i>araR</i> knock out EH1.2 (5' flank)       |
| araRP18r    | CAATTCCAGCAGCGGCTT GCCGACATTGGCGATTC              |                 | Southern blot probe - verification <i>araR</i> knock out EH1.2 (5' flank)       |

|                         |                                                |                               |                                                                               |
|-------------------------|------------------------------------------------|-------------------------------|-------------------------------------------------------------------------------|
| araRP17f                | ACACGGCACAATTATCCATCG AGGCCATCGGTTGGAGAGA      |                               | Southern blot probe - verification <i>araR</i> knock out EH1.2 (3' flank)     |
| araRP14r                | TGTCGCTGTAGCTGGAGG                             |                               | Southern blot probe - verification <i>araR</i> knock out EH1.2 (3' flank)     |
| araRP15f-NotI           | aaggaaaaaa <u>GCGGCCGC</u> ACCGTTTGGAAAGTAGTGG | <i>NotI</i> underlined        | PCR amplification <i>araR</i> allele 1kb up for cloning in MA334              |
| araRP16r-NotI           | aaggaaaaaa <u>GCGGCCGC</u> TGTCGCTGTAGCTGGAGG  | <i>NotI</i> underlined        | PCR amplification <i>araR</i> allele 1kb down for cloning in MA334            |
| ABpyrGP12for-EcoRI-Ascl | cggaattcggcgcgccCGGC TGACGTTACCACCACT          | <i>EcoRI, Ascl</i> underlined | Southern blot probe - verification of <i>pyrG-araR</i> integration (5' flank) |
| ABpyrGP10rev-NotI       | aaggaaaaaaGCGGCCGCAGTCAGACCTAATGCCTCGGG        | <i>NotI</i> underlined        | Southern blot probe - verification of <i>pyrG-araR</i> integration (5' flank) |
| ABpyrGP11for-NotI       | aaggaaaaaa <u>GCGGCCGC</u> CGTCGCGTGATAAGGGTTG | <i>NotI</i> underlined        | Southern blot probe - verification of <i>pyrG-araR</i> integration (3' flank) |
| ABpyrGP13rev-EcoRI-Ascl | cggaattcggcgcgccTCGGGTCAATTCCTCTGTTG           | <i>EcoRI, Ascl</i> underlined | Southern blot probe - verification of <i>pyrG-araR</i> integration (3' flank) |
|                         |                                                |                               |                                                                               |
| abfA_f                  | AATCACTCAGGAGATGGAGG                           |                               | <i>abfA</i> probe                                                             |
| abfA_r                  | TTGACTTATAGGTTTCGCC                            |                               |                                                                               |
| AnAbfBP1f               | GTTACAGTGGGCCCTGTGACATCTACGAAG                 |                               | <i>abfB</i> probe                                                             |
| AnAbfBP2r               | CGTCTAGAAACGAAGCAAACGCCGTCTCAATC               |                               |                                                                               |
| abfCP1f                 | TTGAAGCTCCTTGATCCCAG                           |                               | <i>abfC</i> probe                                                             |
| abfCP2r                 | ATGGTCCATCCCCGCATATA                           |                               |                                                                               |
| abnA_f                  | GCCCCGGATGTCTCC                                |                               | <i>abnA</i> probe                                                             |
| abnA_r                  | GAAATCACCCGTGGGCG                              |                               |                                                                               |
| 18SrRNANF               | GCCTGCGGCTTAATTTGACTC                          |                               | 18S probe                                                                     |
| 18SrRNANR               | TGACCAACTTCCGGCTCTG                            |                               |                                                                               |

A

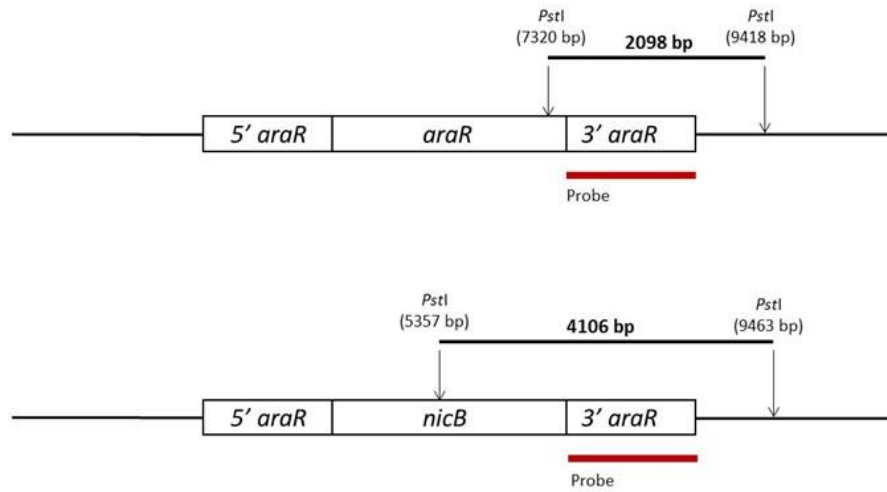

B

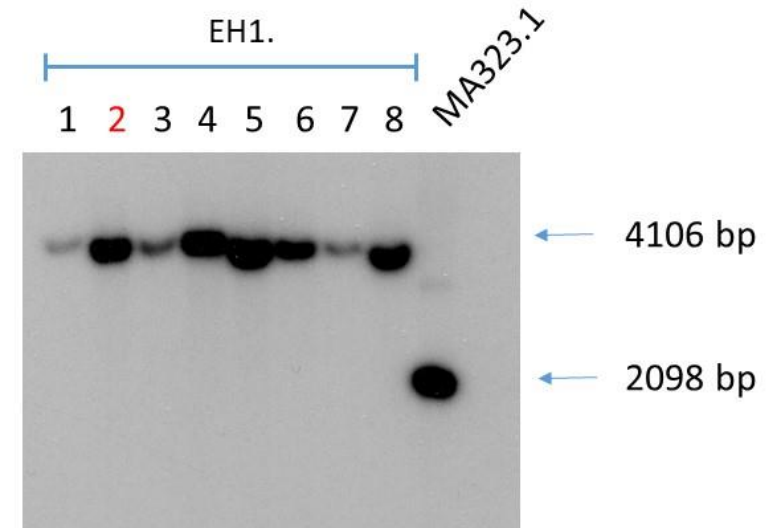

Supplemental Fig. 1. Southern blot analysis to verify *araR::nicB* deletion in MA323.1 to give EH1.2. A) Schematic representation of *araR* locus and in the *araR::nicB* locus in the deletion strain. DNA fragments expected to hybridize after digestion of genomic DNA with *Pst*I are indicated. B) Genomic DNA of eight putative *araR::hygB* transformants (EH1.1 to EH1.8) and the parental strain (MA323.1) was analysed. EH1.2 was selected for further analysis.

A

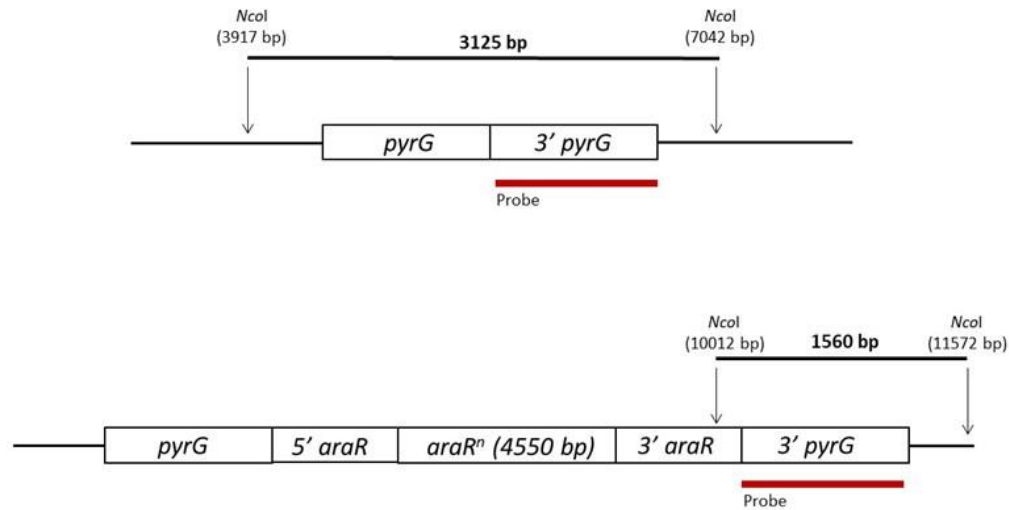

B

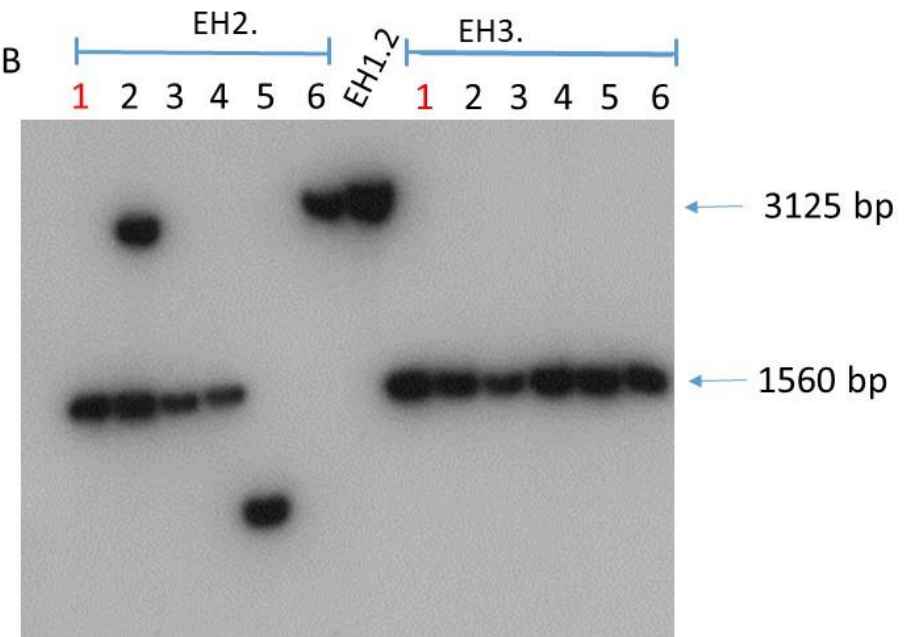

Supplemental Fig. 2. Southern blot analysis to verify *araR* integration in EH1.2 to give EH2.1 and EH3.1. A) Schematic representation of *pyrG* locus in EH1.2 and after integration of the *araR* gene at the *pyrG* locus. DNA fragments expected to hybridize after digestion of genomic DNA with *NcoI* are indicated. B) Genomic DNA of six putative *araR*<sup>wt</sup> and *araR*<sup>N801I</sup> transformants (EH2.1 to EH2.6 and EH3.1 to EH3.6 and the parental strain (EH1.2) was analysed. EH2.1 and EH3.1 (indicated in red) were selected for further analysis.

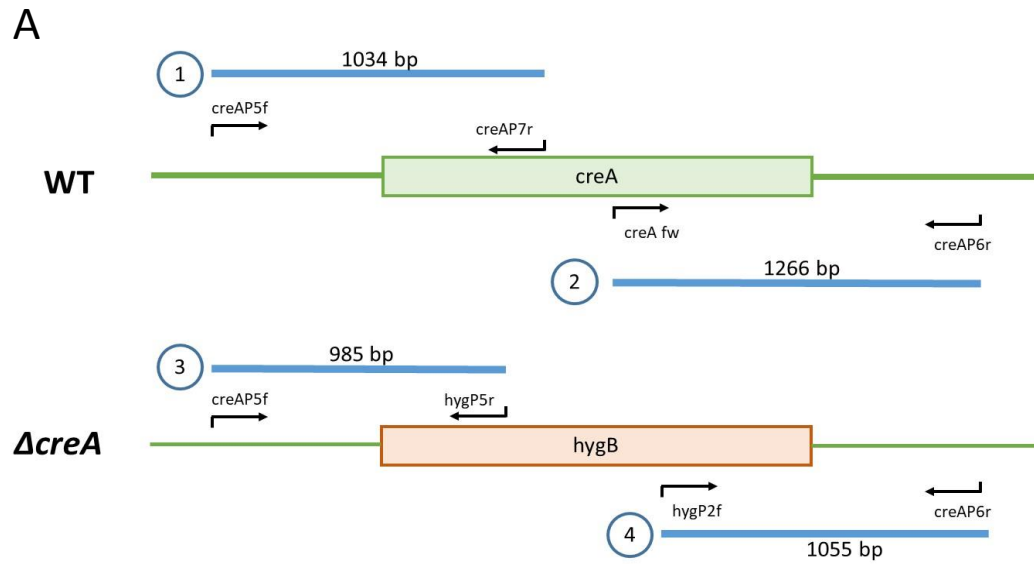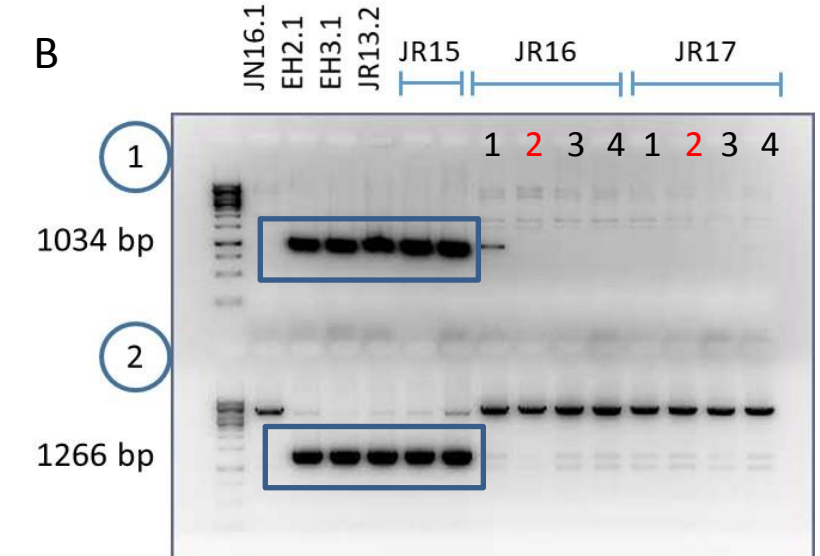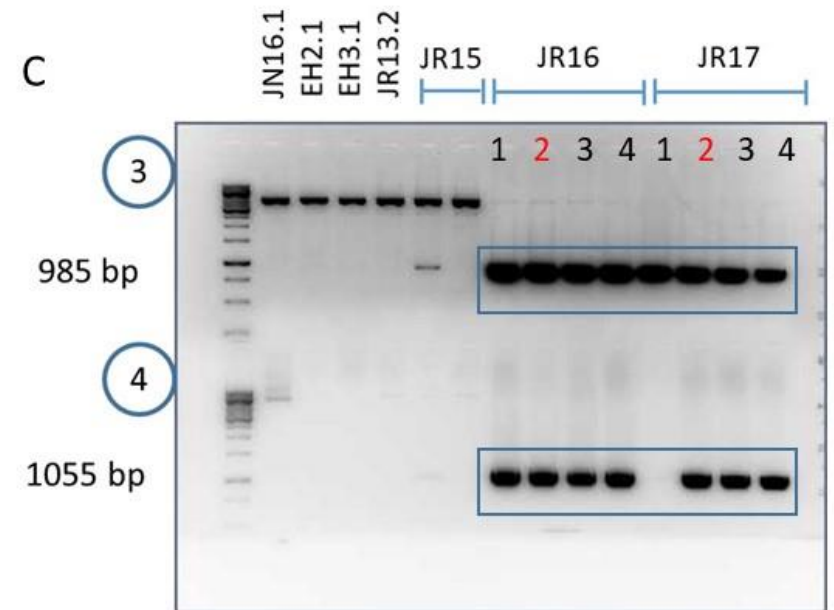

Supplemental Fig. 3. Diagnostic PCR to confirm deletion of *creA* in JR16.2 and JR17.2. A) Schematic representation of *creA* locus and in the *creA::hygB* locus in the deletion strain. DNA fragments expected after PCR are indicated. B) PCR fragments after amplification with indicated primer pairs to confirm presence of *creA*; C) PCR fragments after amplification with indicated primer pairs to confirm absence of *creA*. Relevant PCR fragments are boxed.

A

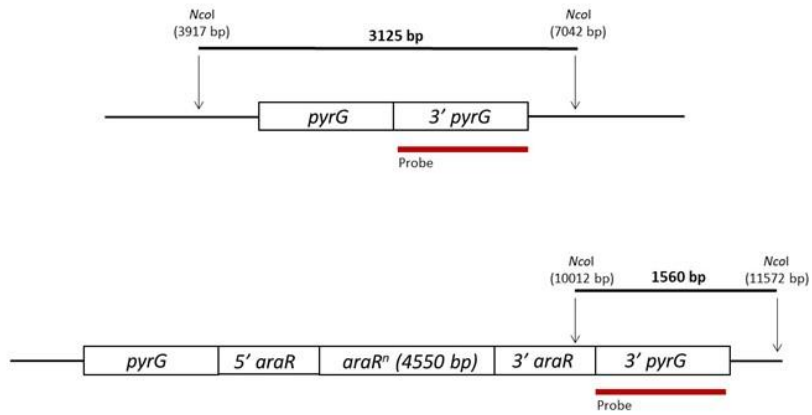

B

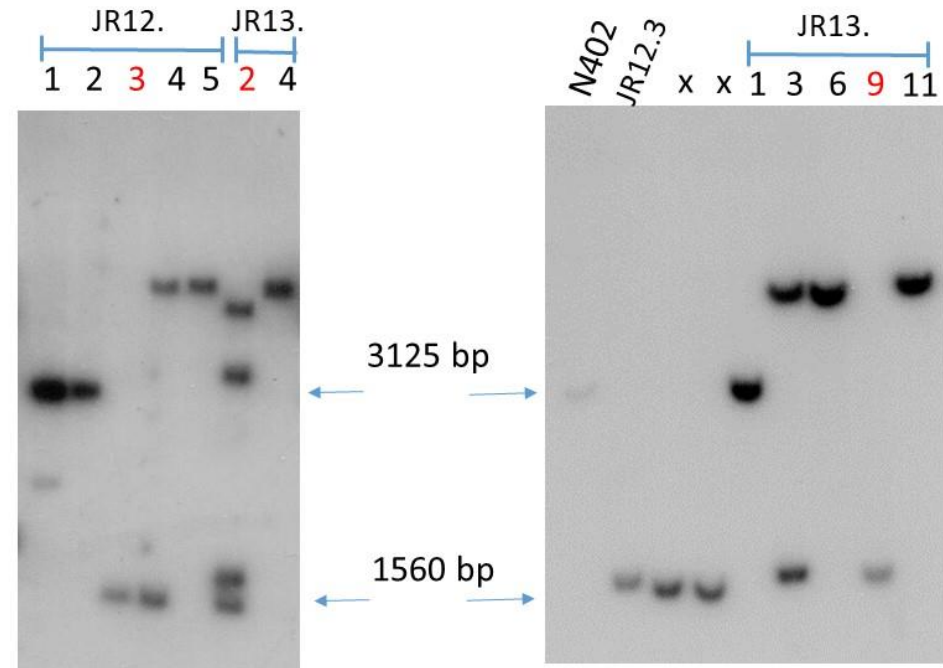

Supplemental Fig. 4. Southern blot analysis to verify *araR*<sup>wt</sup> or *araR*<sup>N801I</sup> integration in AB4.1 to give JR12.3, JR13.2 and JR13.9 A) Schematic representation of *pyrG* locus in AB4.1 and after integration of the *araR* gene at the *pyrG* locus. DNA fragments expected to hybridize after digestion of genomic DNA with *NcoI* are indicated. B) Genomic DNA of pattern of transformants. JR12.3 single-copy *araR*<sup>wt</sup>, JR13.2 (multi-copy *araR*<sup>N801I</sup>) and JR13.9 (single-copy *araR*<sup>N801I</sup>) (indicated in red) were selected for further analysis.

Supplemental Fig. 5. Alignments AraR and XlnR in four Aspergilli species and Xyr1 from *Trichoderma reesei*

|                                              |                                                                                                                             |     |
|----------------------------------------------|-----------------------------------------------------------------------------------------------------------------------------|-----|
| AnidAraR (1-825)                             | -----                                                                                                                       | 0   |
| AoryAraR (1-830)                             | -----                                                                                                                       | 0   |
| AfumAraR (1-838)                             | -----                                                                                                                       | 0   |
| AnigAraR (1-832)                             | -----                                                                                                                       | 0   |
| TreXyr1 (1-940)                              | MLSNPLRRYSAYPDISSASFDPNYHG----SQSHLHSINVNTFGNSHPYPMQHQAQHAEL                                                                | 56  |
| AnidXlnR (1-875)                             | -----MSQSQSQTIGLDTLAEGSQYVLEQLQLSREG                                                                                        | 31  |
| AoryXlnR (1-971)                             | MSTTSIQHFT-----SSFSPFSSGTQPVGMAQSQTVGLDTLAEGSQYALEQLQLSREA                                                                  | 53  |
| AnigXlnR (1-875)                             | -----                                                                                                                       | 0   |
| AfumXlnR                                     | MSTTSLQHFP-----HSYSPFSSRSLNRMAQSQTSGLDTLAEGSQYALEQLQMSREA                                                                   | 53  |
|                                              |                                                                                                                             |     |
| AnidAraR (1-825)                             | -----MASSH-----QGN---G---TVPNSQTDAP                                                                                         | 19  |
| AoryAraR (1-830)                             | -----MDPAQ-----SGD---APQGNQGTDD-P                                                                                           | 21  |
| AfumAraR (1-838)                             | -----MDLAQ-----PGD---APPTSTNTAGTLED                                                                                         | 22  |
| AnigAraR (1-832)                             | -----MDSAQ-----SGD---AQAPNVPAATEEPT                                                                                         | 22  |
| TreXyr1 (1-940)                              | SSSRM-----I-----RASPVPQPKQRQGSLIAAR--KN                                                                                     | 82  |
| AnidXlnR (1-875)                             | GNSE-----NNSTFKPSSVRDSLAEARSMIR                                                                                             | 57  |
| AoryXlnR (1-971)                             | NGASAVDGGVNPPLRSSISKPQQQLYSDESSAQHTQNATTGFRNLPQRDQLAEARSTIR                                                                 | 113 |
| AnigXlnR (1-875)                             | -----MSHT-----KDQ--PP--FDNEKNQSTGSGFRDALQRDPLVEARSAIR                                                                       | 39  |
| AfumXlnR                                     | AGSGEATDSVGKP-----KDQ--FQVDNDNHNNHSLSNFKNPSQRDPLVEARSTIR                                                                    | 103 |
| :                                            |                                                                                                                             |     |
| AnidAraR (1-825)                             | PDSSTKRRWRRNRIA <b>CD</b> SCHARRVRCDRQ <b>FPCS</b> RCLRSEITC <b>EF</b> TRERRRKRGRRIARSKLA                                   | 79  |
| AoryAraR (1-830)                             | QNSSAKRKWRRNRIA <b>CD</b> ACHARRVRC <b>DRA</b> F <b>PCS</b> RCLRSEIQ <b>CE</b> FTREERRRKRGRRIARSKQT                         | 81  |
| AfumAraR (1-838)                             | SSSTAKRRWRRNRIA <b>CD</b> SCHSRRVRC <b>DRA</b> F <b>PCS</b> RCLRSEIR <b>CE</b> FTREERRRKRGRRIARSKQT                         | 82  |
| AnigAraR (1-832)                             | GEATTKRRWRRNRIA <b>CD</b> SCHSRRVRC <b>DRA</b> F <b>PCS</b> RCLRSDIR <b>CE</b> FTREERRRKRGRRIARSRLV                         | 82  |
| TreXyr1 (1-940)                              | STGTAGPIRRRISRA <b>CD</b> QC <b>NQL</b> RTK <b>CD</b> GLH <b>PCA</b> HCIE <b>FGL</b> GC <b>EY</b> VRERKKRGKASRKDIA          | 142 |
| AnidXlnR (1-875)                             | KNSSAPVRRRISRA <b>CD</b> QC <b>NQL</b> RTK <b>CD</b> G <b>Q</b> N <b>PCA</b> HCIE <b>FGL</b> TC <b>EY</b> ARERKKRGKASKKDIA  | 117 |
| AoryXlnR (1-971)                             | KSSNSGPVRRRISRA <b>CD</b> QC <b>NQL</b> RTK <b>CD</b> G <b>Q</b> N <b>PCA</b> HCIE <b>FGL</b> TC <b>EY</b> ARERKKRGKASKKDLA | 173 |
| AnigXlnR (1-875)                             | KTSSAPVRRRISRA <b>CD</b> QC <b>NQL</b> RTK <b>CD</b> G <b>Q</b> H <b>PCA</b> HCIE <b>FGL</b> TC <b>EY</b> ARERKKRGKASKKDLA  | 99  |
| AfumXlnR                                     | KNSASAPVRRRISRA <b>CD</b> QC <b>NQL</b> RTK <b>CD</b> G <b>Q</b> N <b>PCA</b> HCID <b>FGL</b> TC <b>EY</b> ARERKKRGKASKKDLA | 163 |
| . : ** *** *: *.:** **:*: : **:.**:***: :. . |                                                                                                                             |     |



|                 |                                                               |     |
|-----------------|---------------------------------------------------------------|-----|
| AnidAraR(1-825) | EMAKNKMETSETPAPAKT-----MNGIP-----APAGTEIPGHVSPASTFHHR         | 122 |
| AoryAraR(1-830) | NTNGGTEKLSAALSNGRV-----PAPSTADAGDAVATPAPN-GSPSSSFPHR          | 128 |
| AfumAraR(1-838) | ATVPNGGSMEKLPKAPNV-----QPPVPAAVPADAAPTPLPNHASPTTSFQHR         | 130 |
| AnigAraR(1-832) | ETKTA---VEKASQPV-----ETRDSAPAPAEAGSGVPVN-GSPSSTFHHR           | 124 |
| TreXyrl(1-940)  | AQQAAAAAAQHSGVQDGPEDQHRK--LSRQQSESSRGS AEL---AQP AHDPPHGHIEGS | 197 |
| AnidXlnR(1-875) | AAAAAAGHQG-----GMGNRSPTDRRLSQEPGGRYDSVLEAS-----RV             | 156 |
| AoryXlnR(1-971) | AAAAAVANNNGTA-PTSNGNTSNDVSSAKRHTPSDGQSTQEVSGRYDPNFDAS-----RN  | 227 |
| AnigXlnR(1-875) | AAAAAAT-----QGSNGHSGQANASLMGERTSEDSRPGQDVNGTYDSAFESH-----HL   | 148 |
| AfumXlnR        | AAAAAAAATNSGQPNGSSGKEDAALVGGHTSPDRRP--TINGRYDPAFEVP-----RN    | 216 |

|                 |                                                                |     |
|-----------------|----------------------------------------------------------------|-----|
| AnidAraR(1-825) | SPP-----ANA-----PTVSAPSVDGRRSQTDQPQLP-----V                    | 149 |
| AoryAraR(1-830) | SPG-----TNE-----MTASAPSVDERRSQ AELPLA-----P                    | 155 |
| AfumAraR(1-838) | SPA-----TNE-----MTVSAHSIDRRSQADPSLP-----A                      | 157 |
| AnigAraR(1-832) | SPA-----TND-----VTGSAPSIDERRSQADVSLP-----P                     | 151 |
| TreXyrl(1-940)  | VSSFSDNGLSQHAAMGGMDGLEDHGH-VGVDPALGRTQLEASSAMGLGAYGEVH----P    | 252 |
| AnidXlnR(1-875) | Q-----SHLPANGLSSIHTQ--AAHSQPPLGSA----LDALHLNHFTQLNESGRS        | 201 |
| AoryXlnR(1-971) | LATAGQSQLGQHS DMSGMAGMQGSQQ-TPHSQPSLGA----IDAIHLNHFN TLNDSNRP  | 282 |
| AnigXlnR(1-875) | SSQP SHM---QHASTAGISGLHESQTAPSHSQPSLGT-----IDAMHLNHFN TMNDSGRP | 201 |
| AfumXlnR        | L--NGSA---QHSEASGMVGMQNSQHLPPHSQSSMGGG----LEGLPLNGYNGLNDSGRP   | 267 |

: . : .

|                 |                                                               |     |
|-----------------|---------------------------------------------------------------|-----|
| AnidAraR(1-825) | RRPEIGGNVTEEWLAGTH---VSPGSYEF LNGPAFGEGLGPF-----PHMFDVWN      | 196 |
| AoryAraR(1-830) | RKLAPGGNVTEEWLAAAH---VSPGSYDFLGG-GLG--EGPF-----PRMFDVWS       | 199 |
| AfumAraR(1-838) | RRPGPTGNVTEEWLSAAH---VSPDSYEV LGGGAWG--DGPL-----PRVLDIWN      | 202 |
| AnigAraR(1-832) | RKPGHTVNATEEWLAGTH---VSPGSYEPLAGIGPG--EGPF-----PRIFDIWN       | 196 |
| TreXyrl(1-940)  | GYESPGMNG-HVMV-----PPS-YGAQTTMAGYSGISYAAQAPSPATYSSDGNFRL      | 301 |
| AnidXlnR(1-875) | QMPVSDLRS-LQILHNNPR---SPSA-L-PHGL-NAYNDNTFSL LNSQEPNTTSLNHFRL | 254 |
| AoryXlnR(1-971) | QMSVPDLRS-LQMLHPSGANTRSPSGALPPQGMNSGYNDGAYSLMNASEANHPSINQYRL  | 341 |
| AnigXlnR(1-875) | AMSIDLRS-L-----PPSVLPPQGLSSGYNASAFALVNPQEPGSP-ANQFRL          | 247 |
| AfumXlnR        | SMPVPELQS-LHMLHNSHTNPRSPSSILPHHRYNGGYNDSAYSILMNPQEPNSTSISHFRL | 326 |

\*

|                 |                                                               |     |
|-----------------|---------------------------------------------------------------|-----|
| AnidAraR(1-825) | GVDLAAYSAG-----TSQGSKAT-----N---APSTSTAPLKYPVLQPLMPFV         | 236 |
| AoryAraR(1-830) | GVDLSNNSGP-----TPQGAKVS-----GAGQTPGVPPASLKYPVLQPLMPFL         | 242 |
| AfumAraR(1-838) | GADLAGYSAP-----TVQSSKPA-----GAARAPSISSSTTLKYPVLQPLMPFL        | 245 |
| AnigAraR(1-832) | GVDLAGYSDP-----ASQGSKIT-----GLGQTPAPSATILKYPVLQPVMPYL         | 239 |
| TreXyrl(1-940)  | TGHIHDYPL-----ANGSSPSWGVSLASPSNQFQLQLSQPIFKQSDLRYPVLEPLLPHL   | 355 |
| AnidXlnR(1-875) | GNSTDNPSAQFLGLSPPAQSPGWL-PLPSPSPANFSPFMAPFSGTSLRYPVLQPVLPHI   | 313 |
| AoryXlnR(1-971) | GNSAENPPAPFLGLSPPAQSPGWL-SLPSPSPANFASFSPMPFSS-TLRYPVLQPVLPHI  | 399 |
| AnigXlnR(1-875) | GSSAENPTAPFLGLSPPGQSPGWL-PLPSPSPANFSPFSLHPFSS-TLRYPVLQPVLPHI  | 305 |
| AfumXlnR        | GSSTENPPNSFLGLSPPAQSPGWL-PLPSPSPANFSPFSPMASFST-TLRYPVLHPVLPHI | 384 |

\*:\*\*\*\*.\*:.\*:.\*:

|                 |                                                                  |     |
|-----------------|------------------------------------------------------------------|-----|
| AnidAraR(1-825) | EATLPRKLVFDLLDLYFTSAFSTHMHPV-----SFLSKDAPRPSSPALLSSML            | 284 |
| AoryAraR(1-830) | DANLPRRLVFDLLELYFTSAFSTQMHPVCHHIHSYILRKASFLSRDAPRPSTPALLASML     | 302 |
| AfumAraR(1-838) | EANLPRRLVFDLLELYFTSAFSTHMHPVCHHIHCYVLRKASFLSRENPRPSSPALLASML     | 305 |
| AnigAraR(1-832) | ESSLPRKLVYDLDLYFTSAFSTHMHPVCHHIHCYVLRKASFLSREAPRPSSPALLASML      | 299 |
| TreXyrl(1-940)  | GNILPVS LACDLIDLYFSSSSSAQMHPMSPYVLGFVFRKRSFLHPTNPRRCQPALLASML    | 415 |
| AnidXlnR(1-875) | ASII PQSLACDLLDLYFTSSSSSHLSPQSPYVVGYIFRKQSF LHP TKPRVCS PGLLASML | 373 |
| AoryXlnR(1-971) | ASII PQSLACDLLDVYFTSFSPSHLSPQSPYVVGYIFRKQSF LHP TKPRVCS PGLLASML | 459 |
| AnigXlnR(1-875) | ASII PQSLACDLLDVYFTSSSSSHLSPQSPYVVGYIFRKQSF LHP TKPRICSPGLLASML  | 365 |
| AfumXlnR        | ASII PQSLACDLLDVYFTSSSSSHLSPQSPYVVGYIFRKQSF LHP TKPRVCTPGLLASML  | 444 |

:\* \*.\*\*:::\*\*.\* :::\* \*\*\* \*\* .\*.\*\*.\*\*\*

**AraR-307**

|                 |                                                               |     |
|-----------------|---------------------------------------------------------------|-----|
| AnidAraR(1-825) | WVAALDDRAFSLPISPPQRKRICQFLCALTIRLLRPLIHVSFKDQGAAAAVAAAAAAT    | 344 |
| AoryAraR(1-830) | WVAALDDRAFALSISPQQRKNICQFLCALTIRLLRPLIHVSFKDQGAS-----         | 350 |
| AfumAraR(1-838) | WVAALDDRAFALSISPQQRKKICQFLCALTIRLLRPLIHVSFKEQAGSNA-----       | 355 |
| AnigAraR(1-832) | WVAALDDRAFALPISPPQRKKICQFLCALTIRLLRPLIHVSFKEQEGAAA-----       | 349 |
| TreXyrl(1-940)  | WVAAQTSEASFLTSLPSARSKVCQKLELTVGLLQPLIHTG---TNSPSPKTS-----VV   | 468 |
| AnidXlnR(1-875) | WVGAQTS DAPFLTSPPSARGRVCQKLELTIGLLRPLIHG PALGEASPNYAANM----VI | 429 |
| AoryXlnR(1-971) | WVAAQTS DAAFLTSPPSARGRVCQKLELTIGLLRPLIHG PAPGETSPNYAANM----VI | 515 |
| AnigXlnR(1-875) | WVAAQTS EAAFLTSPPSARGRVCQKLELTIGLLRPLVHG PATGEASPNYAANM----VI | 421 |
| AfumXlnR        | WVAAQTS DAPFLTSPPSARGRVCQKLELTIGLLRPLIHG PAPGETSPNYAANM----VI | 500 |

\*\*.\* . \* \* \* \* .:\*\* \* \*\* : \*\*.\*\*\*.\*

**AraR-399**

|                 |                                                          |             |     |
|-----------------|----------------------------------------------------------|-------------|-----|
| AnidAraR(1-825) | NNPAFAGVQDLPTTVVHHPFEGGGDDRGLVGPAGSLDDVITYIHVASI         | IISSEQKAASM | 404 |
| AoryAraR(1-830) | ---LSEPVGQELPPTTVVHHPFEGGGDDRGLVGPAGSLDDVITYIHVASI       | IISSEQKAASM | 407 |
| AfumAraR(1-838) | SDPTFTGVAPECPPTTVVHHPFESSGDDRGLVGPAGSLDDVITYIHVASI       | IISSEQKAASM | 415 |
| AnigAraR(1-832) | SDPLHAAVQDGPPTTVVHHPFVGGDDRGLVGPAGSLDDVITYIHVASI         | IISSEQKAASM | 409 |
| TreXyrl(1-940)  | GAAALGVLGVAMPG---SLNMDSLAGEFGAIGSLDDVITYVHLATVVSASEYKASL |             | 525 |
| AnidXlnR(1-875) | NGVALGGFGVSMD-----QLGAQ---STATGAVDDVATYVHLATVVSASEYKAASM |             | 477 |
| AoryXlnR(1-971) | NGVALGGFGVSMD-----QLGAQ---SSATGAVDDVATYVHLATVISASEYKAASM |             | 563 |
| AnigXlnR(1-875) | NGVALGGFGVSMD-----QLGAQ---SSATGAVDDVATYVHLATVVSASEYKAASM |             | 469 |
| AfumXlnR        | NGVALGGFGVSMD-----QLGAQ---SSATGAVDDVATYVHLATVISASEYKAASM |             | 548 |

. . . . . : \*.:\*\*\* \*\*.\*:\*.:.\*:\*\* \*.\*\*:

**AraR-416**

|                 |                                                              |  |     |
|-----------------|--------------------------------------------------------------|--|-----|
| AnidAraR(1-825) | RWWHAAFTLARELKLNQEIEVMPNGDSQVEGSSPPFGYSLPGWDGADPGPVFNYS-NPTR |  | 463 |
| AoryAraR(1-830) | RWWHAAFTLARELKLNQEIEVLPNVDQTQEGSSPSFDYALPGWNGVETRPFDFDS-NPTR |  | 466 |
| AfumAraR(1-838) | RWWHAAFTLARELKLNQEIEVI PNADGQTEGSSPAFDYSLPGWSGVDTGAFDYS-NPTR |  | 474 |
| AnigAraR(1-832) | RWWHAAFTLARELKLNQEIEVMPSEENHPGSSPSFDYSLAGWSGVDTGPFDFYS-NPAR  |  | 468 |
| TreXyrl(1-940)  | RWWGAAWSLARELKLGRELPPGNPPANQEDGEGLSED-----VDEH-----          |  | 566 |
| AnidXlnR(1-875) | RWWTAAWSLARELKLGRELPPNASQPGQDGERENEGD-----NPSKRN---          |  | 520 |
| AoryXlnR(1-971) | RWWTAAWSLARELKLGRELPPNAPQPRQDGEPEDDTD-----VMSKRNLP           |  | 609 |
| AnigXlnR(1-875) | RWWTAAWSLARELKLGRELPPNVSHARQDGERDGDGE-----A--DKRHPP          |  | 513 |
| AfumXlnR        | RWWTAAWSLARELKLGRELPPNTPHARPAERDGDPD-----ADLSKRHPP           |  | 594 |

\*\*\* \*\*.:\*\*\*\*\*.:\*:

**AraR-504**

|                 |                                                               |  |     |
|-----------------|---------------------------------------------------------------|--|-----|
| AnidAraR(1-825) | SSLNCVCDRQD--QNTITEEHREERRRTWLLYIMDRHLALCYNRPLALLDAESEDLLL    |  | 521 |
| AoryAraR(1-830) | PSLNCVCDR-HDMHNTITEEHREERRRAWLLYIMDRHLALCYNRPLALLDAESEDLLL    |  | 525 |
| AfumAraR(1-838) | PSLNCVCDRSHDPHATITEEHREERRRTWLLYIMDRHLALCYNRPLALLDAESEDLLL    |  | 534 |
| AnigAraR(1-832) | PSLNCVCDRGHELARGAITEEHREERRRTWLLYIMDRHLALCYNRPLALLDAESEDLLL   |  | 528 |
| TreXyrl(1-940)  | -----DLNRNTRFVTEEEREERRRAWLVYIVDRHLALCYNRPLFLLDSECSPLYHP      |  | 619 |
| AnidXlnR(1-875) | -----QLHGGNSNVNTEEEREERRRLWLLYATDRHLALCYNRPLTLLDKECSQLLQP     |  | 575 |
| AoryXlnR(1-971) | PLITSVGGNSGSTILNVTEEEREERRRLWLLYATDRHLALCYNRPLTLLDKECEGLLQP   |  | 669 |
| AnigXlnR(1-875) | TLITSLGHGSGSSGINVTEEEREERRRLWLLYATDRHLALCYNRPLTLLDKECGLLQP    |  | 573 |
| AfumXlnR        | PLITSMGHGPGNTIINI TE EEREERRRLWLLYATDRHLALCYNRPLTLLDKECEGLLQP |  | 654 |

:\*\*\*.\*\*\*\*\* \*\*.\* \*\*\*\*\* \*\*.\* \* \* \*

|                 |                                                 |                               |                             |                      |     |
|-----------------|-------------------------------------------------|-------------------------------|-----------------------------|----------------------|-----|
| AnidAraR(1-825) | LDEASWQSGIIHSNSPK-----SDGPQCCLLSADKNKRRLLFPNFI  | CHDHSVFGFFLPLMTI              | 576                         |                      |     |
| AoryAraR(1-830) | LDEGSWQSGNIHSNSPR-----PDGPQCCLLSGDKNKR          | RVPNFBVCHDHSIFGFFLPLMTI       | 580                         |                      |     |
| AfumAraR(1-838) | LDEGSWQAGNVHSNSPK-----PDGPHCPISGEK              | NKRVPDFICHHSIFGFFLPLMTI       | 589                         |                      |     |
| AnigAraR(1-832) | LDEGSWQSGNIHSNSPK-----PDGPQCPLS                 | GEKNRVPNFI                    | CHDHSIFGFFLPLMTI            | 583                  |     |
| TreXyrl(1-940)  | MDDIKWQAGKFRSHDAGNSSINIDSSMTDEF                 | GDSPRAARGAHYECRGRSIFGYF       | LSLMTI                      | 679                  |     |
| AnidXlnR(1-875) | MNDDLWQAGDFPAAT-----YRAVGPPI                    | ECTGHSMFGYFLPLMTI             | 615                         |                      |     |
| AoryXlnR(1-971) | MNDDLWQAGDFAGAT-----YRQVGP                      | QVECTGHSMFGFFLPLMTI           | 709                         |                      |     |
| AnigXlnR(1-875) | MNDDLWQVGDFAAAA-----YRQVGPP                     | VECTGHSMYGYFLPLMTI            | 613                         |                      |     |
| AfumXlnR        | MNDDLWQAGDFA--T-----YRQAGPP                     | VECTGHSMFGYFLPLMTI            | 692                         |                      |     |
|                 | ::: ** * . * . : . : : * : * : * * * * * * * *  |                               |                             |                      |     |
|                 | <b>AraR-600</b>                                 |                               |                             |                      |     |
| AnidAraR(1-825) | TGELIDLNQARNHPMLGMRLNGKDAWNVHVSE                | VLRQLEIYKASLTTFAATSDPE-----   | 631                         |                      |     |
| AoryAraR(1-830) | TGELIDLNQSRNHPMLGVRLNGKDAWDVHVNA                | VLGQLEIYKASLTTFAATASDPE-----  | 635                         |                      |     |
| AfumAraR(1-838) | TGELIDLNQARNHPMLGSRLHGKDGWD AHLSE               | VLRQLEIYKASLTTFAATAAVPE-----  | 644                         |                      |     |
| AnigAraR(1-832) | TGELIDLNQARNHPMLGARLNGKDPWDAHVG                 | EVLRQLELYKASLTTFAATASDPD----- | 638                         |                      |     |
| TreXyrl(1-940)  | LGEIVDVVHAKSHPRFVGFRSARDWDEQV                   | AEITRHLDMYEESLKR              | FVAKHLPLSSKDKE              | 739                  |     |
| AnidXlnR(1-875) | LGGIIDLQQAREHPRYGLTFRSGPDL                      | DQYIMAITQQLDAYGQSLKDF         | FEARYINSLALAEN              | 675                  |     |
| AoryXlnR(1-971) | LGEIVDLQQAKEHPRFGRVFRNSADWD                     | HQVLEITRQLD TYAQSLKEFEARY     | TSSSLALGAG                  | 769                  |     |
| AnigXlnR(1-875) | LGGIVDLHHAENHPRFGLAFRNSP                        | EWERQVLDVTRQLD TYGRSLKEFEARY  | TSNLTLGAT                   | 673                  |     |
| AfumXlnR        | LGEIVDLQQARNHPRFGLAFRNSAECE                     | AQVLEIARQLDVYQSLKEFETRY       | TSSSLALGAA                  | 752                  |     |
|                 | * : : * : : : . . * * : . . : : : * : * * . * : |                               |                             |                      |     |
|                 | <b>AraR-671</b>                                 |                               |                             |                      |     |
| AnidAraR(1-825) | ---APLSA-YAHAQSE---HLP                          | AEPSLSQAYAWHTQTVIS            | YASYLVHVLHILLVGKWDPV        | 684                  |     |
| AoryAraR(1-830) | ---APLSYAYPPP                                   | KS---TNGVDPAL                 | TQAYSWHTQTVIS               | YASYLVHVLHILLVGKWDPV | 689 |
| AfumAraR(1-838) | ---APLATTYRPPG-P---DPP                          | VEPSLSQAFSWHTQTVI             | YASYLVHVLHILLVGKWDPV        | 697                  |     |
| AnigAraR(1-832) | ---APLSSAFP                                     | PKP-D---QQP                   | VEPSLAQAYSWHTQTVIS          | YASYLVHVLHILLVGKWDPV | 691 |
| TreXyrl(1-940)  | QHMHDSGAVTDMQSPLS-VR                            | TNASSRMTESEIQASIV             | VAYSTHVMHVLHILLADKWDPI      | 798                  |     |
| AnidXlnR(1-875) | E---PPENPHIDHLS                                 | PSGRSSSTVGSRVNESIV            | HTKMVVAYGTHIMHVLYVLLAGKWDPI | 732                  |     |
| AoryXlnR(1-971) | ESEAAIEGSHLDHVS                                 | PSGRSTSTAGSRVNESIV            | HTKMVVAYGTHIMHVLYVLLAGKWDPI | 829                  |     |
| AnigXlnR(1-875) | DNEPVVEGAHLDHTS                                 | PSGRSSSTVGSRVSESIV            | HTRMVVAYGTHIMHVLYVLLAGKWDPI | 733                  |     |
| AfumXlnR        | ETEAAMDGSHPNHVS                                 | PSGRSSSTVESRVNESIV            | HTKMVVAYGTHIMHVLYVLLAGKWDPI | 812                  |     |
|                 | : : * : * : : : : * * * : * * * * * : :         |                               |                             |                      |     |

|                 |                                                         |                                 |          |
|-----------------|---------------------------------------------------------|---------------------------------|----------|
|                 | XlnR-V756                                               | XlnR-A759                       |          |
| AnidAraR(1-825) | SLIEDKDFWTSSPAFASTISHALDAADSV                           | QILRYDPDISFMPYFFGIQLLQGSFLLLLL  | 744      |
| AoryAraR(1-830) | SLIEDKDFWTSSPAFASTISHALDAADSV                           | QILRFDPDISFMPYFFGIQLLQGSFLLLLL  | 749      |
| AfumAraR(1-838) | SLIEDKDFWTSSPAFASTISHALDAADSV                           | HQILRYDPDISFMPYFFGIQLLQGSFLLLLL | 757      |
| AnigAraR(1-832) | SLIEDKDFWTSSPAFASTISHALDAADSV                           | DHILRYDPDISFMPYFFGIQLLQGSFLLLLL | 751      |
| TreXyr1(1-940)  | NLLDDDDLWISSEGFVTATSHAVSAAEAIS                          | QILEFDPGLEFMPFFYGVYLLQGSFLLLLL  | 858      |
| AnidXlnR(1-875) | NLLEDHDMWISSESFIAAMSHAVGAAEAAAD                         | ILEYDPDLSFMPFFFGIYLLQGSFLLLLL   | 792      |
| AoryXlnR(1-971) | NLLEDHDLWISSESFIAAMSHAVGAAEAAAD                         | ILEYDPDITFMPFFFGIYLLQGSFLLLLL   | 889      |
| AnigXlnR(1-875) | NLLEDHDLWISSESFVSAAMSHAVGAAEAAAE                        | ILEYDPDLSFMPFFFGIYLLQGSFLLLLL   | 793      |
| AfumXlnR        | NLLDDNDLWISSESFVAAMGHAVGAAEAAAE                         | ILEYDPDLSFMPFFFGIYLLQGSFLLLLLT  | 872      |
|                 | .*:.*.*.* ** . * :: .**:.**:. : **:.**.: ***.*.*: ***** |                                 |          |
|                 | AraR-763                                                | AraR-806                        | AraR-809 |
| AnidAraR(1-825) | VERLQKEAGEGILLNACEVMIRATESCVVTL                         | NTEYQRNFRQVMRSAVAQARGR-PVNHSEI  | 803      |
| AoryAraR(1-830) | VERLQKEAGEGILLNACEVMIRATESCVVTL                         | NTEYQRNFRQVMRSAVAQARGR-PVNHSEI  | 808      |
| AfumAraR(1-838) | VERLQKEAGEGILLNACEVMIRATESCVVTL                         | NTEYQRNFRQVMRSAVAQARGR-PVNHSEI  | 816      |
| AnigAraR(1-832) | VERLQKEAGEGILLNACEVMIRATESCVVTL                         | NTEYQRNFRQVMRSAVAQARGR-PVNHSEI  | 810      |
| TreXyr1(1-940)  | ADKLQAEASPSVIKACETIVRAHEACVVTL                          | STEYQRNFSKVMRSALALIRGRVPEDLAEQ  | 918      |
| AnidXlnR(1-875) | ADKLQGDANPSVVRACETIVRAHEACVVTL                          | NTEYQRTFRKVMRSALAQVRGRVPDDFGEQ  | 852      |
| AoryXlnR(1-971) | ADKLQGDVSPSVVRACETIVRAHEACVVTL                          | NTEYQRTFRKVMRSALAQVRGRMPEDFGEQ  | 949      |
| AnigXlnR(1-875) | ADKLQGDASPSVVRACETIVRAHEACVVTL                          | NTEYQRTFRKVMRSALAQVRGRIPEDFGEQ  | 853      |
| AfumXlnR        | ADKLQGDASPSVVRACETIVRAHEACVVTL                          | NTEYQRTFRKVMRSALAQVRGRLPEDFGEQ  | 932      |
|                 | .:** :.. :.:***.:** *.*****.*****.* :*****.* *** * :.*  |                                 |          |
| AnidAraR(1-825) | RHRRKAVLALYRWTRKGTGLAL-                                 | 825                             |          |
| AoryAraR(1-830) | RHRRKAVLALYRWTRKGTGLAL-                                 | 830                             |          |
| AfumAraR(1-838) | RHRRKAVLALYRWTRKGTGLAL-                                 | 838                             |          |
| AnigAraR(1-832) | RHRRKAVLALYRWTRKGTGLAL-                                 | 832                             |          |
| TreXyr1(1-940)  | QQRRELLALYRWTGNGTGLAL-                                  | 940                             |          |
| AnidXlnR(1-875) | QQRREVLALYRWTGDGTGLALS                                  | 875                             |          |
| AoryXlnR(1-971) | QQRREVLALYRWTGDGSGGLAL-                                 | 971                             |          |
| AnigXlnR(1-875) | QQRREVLALYRWSGDGSGGLAL-                                 | 875                             |          |
| AfumXlnR        | QQRREVLALYRWTGDGSGGLAL-                                 | 954                             |          |
|                 | .:** :*:****: .*:****                                   |                                 |          |

Notes: The Zn2Cys6 domain DNA binding domain is indicated in green, In yellow the amino acids, their position in the *A. niger* AraR or XlnR proteins, and their conservation in AraR and XlnR in other filamentous fungi is indicated.
